## 1                    **PCBP1 Deficient Pigs Hold the Potential to Inhibit CSFV Infection**

2    Chunyun Qi<sup>#1</sup>, Daxin Pang<sup>#1,2,3</sup>, Kang Yang<sup>1</sup>, Shuyu Jiao<sup>1</sup>, Heyong Wu<sup>1</sup>, Chuheng  
3    Zhao<sup>1</sup>, Lanxin Hu<sup>1</sup>, Feng Li<sup>1</sup>, Jian Zhou<sup>1</sup>, Lin Yang<sup>1</sup>, Dongmei Lv<sup>1,2,3</sup>, Xiaochun  
4    Tang<sup>1,2,3</sup>, Hongsheng Ouyang<sup>1,2,3,4</sup>, Zicong Xie<sup>\*1,2,3</sup>

5  
6    1. Key Lab for Zoonoses Research, Ministry of Education, Animal Genome Editing T  
7    echnology Innovation Center, Jilin Province, College of Animal Sciences, Jilin Univer  
8    sity, Changchun130062, China;

9    2.Chongqing Research Institute, Jilin University, Chongqing401123, China;

10    3. Chongqing Jitang Biotechnology Research Institute Co., Ltd;

11    4. Shenzhen Kingsino Technology Co., Ltd., Shenzhen, China.

12

13    \* **Corresponding author:** Xinzhu Road, Jilin University, Changchun, Jilin, PR China

14    **E-mail addresss:** [xzc@jlu.edu.cn](mailto:xzc@jlu.edu.cn) (ZC. Xie).

15    Address: 5333#, Xinzhu Road, Changchun 130062, China; Tel.: (86) 431-87836175;

16    Fax: (86) 431-86758018.

17

### 18    **Abstract**

19    Classical swine fever virus (CSFV), pathogen of classic swine fever, has caused severe  
20    economic losses worldwide. Poly (rC)-binding protein 1 (PCBP1), interacting with N<sup>pro</sup>  
21    of CSFV, plays a vital role in CSFV growth. Here, our research is the first report to  
22    generate PCBP1 knockout pigs via gene editing technology. The PCBP1 knockout pigs  
23    exhibited normal birth weight, reproductive-performance traits, and developed  
24    normally. Viral challenge results indicated that primary cells isolated from F<sub>0</sub> and F<sub>1</sub>  
25    generation pigs could significantly reduce CSFV infection. Additional mechanism  
26    exploration further confirmed that PCBP1 KO mediated antiviral effect is related with  
27    the activation of type I interferon. Beyond showing that gene editing strategy can be  
28    used to generate PCBP1 KO pigs, our study introduces a valuable animal model for

29 further investigating infection mechanisms of CSFV that help to develop better antiviral  
30 solution.

### 31 **Importance**

32 As a negative regulator in immune modulation, the effects of PCBP1 on viral replication  
33 have been found to be valuable. Here, this study was the first report to generate PCBP1  
34 knockout pigs with normal pregnancy rate and viability. Primary cells isolated from F<sub>0</sub>  
35 and F<sub>1</sub> generation PCBP1 knockout pigs could significantly reduce CSFV infection.  
36 The PCBP1 knockout pigs could be used as a natural host models for investigating the  
37 effects of PCBP1-mediating critical interactions on viral replication and helping to  
38 develop better antiviral solution.

### 39 **Introduction**

40 Classical swine fever (CSF), driven by CSF virus (CSFV), is a highly contagious  
41 porcine disease, causing substantial economic losses<sup>[1, 2]</sup> and the typical clinical signs  
42 are generally characterized by high fever, inappetence, and general weakness followed  
43 by neurological deterioration, skin hemorrhages, and splenic infarction<sup>[3, 4]</sup>. The  
44 genome of CSFV could encode four structure proteins (C, E<sup>rns</sup>, E1, and E2) and eight  
45 non-structure proteins (N<sup>pro</sup>, p7, NS3, NS4A, NS4B, NS5A, and NS5B), which would  
46 utilize host factors for enhancing replication and evading cellular immunity<sup>[5]</sup>. It has  
47 been confirmed that envelope protein E<sup>rns</sup> would interact with HS or LamR for the  
48 attachment of CSFV particles to the surface of permissive cells and that structure  
49 protein E2 interacted with Anx2 and/or MEK2 to promote CSFV production<sup>[6]</sup>.  
50 Recently, it was proposed that N<sup>pro</sup> could interact with a host factor designated as  
51 PCBP1 which is positive for CSFV replication<sup>[7]</sup>.

52 Poly (rC)-binding protein 1 (PCBP1), an RNA- or DNA-binding protein, could regulate  
53 the process of pre-mRNA, mRNA stability, and translation in nature<sup>[8, 9]</sup>. It also  
54 participated in the formation of iron chaperone complex, influencing the delivery of  
55 iron in cell<sup>[10]</sup>. Additionally, deficiency of PCBP1 could decrease the apoptosis induced  
56 by heavily oxidized RNA in human cells<sup>[11, 12]</sup>. On the other hand, in the virus-host

57 interplay area, it was suggested that PCBP1 was associated with cGAS in a viral  
58 infection-dependent manner and promoted cGAS binding to DNA. PCBP1 deficiency  
59 inhibited cytosolic DNA- and DNA virus-triggered induction of downstream effector  
60 genes<sup>[13]</sup>. Moreover, PCBP1 could mediate housekeeping degradation of MAVS via  
61 ubiquitination by a E3 ubiquitin ligase called AIP4 and overexpression of PCBP1  
62 inhibited SeV-induced antiviral responses<sup>[14]</sup>. Although the PCBP1 is conserved across  
63 various species, due to the reason that retrotransposition of it from a processed PCBP2  
64 predates the mammalian radiation<sup>[15, 16]</sup>, the function of it may be divergent, especially  
65 in the duration of virus infection. It has been reported that PCBP1 interacted with  
66 PRRSV nsp1 $\beta$  and colocalized with viral replication and transcription complex (RTC)  
67 <sup>[17]</sup>, but the confirmation was performed in Marc-145 cell line which was not porcine  
68 cells. What the definite roles of PCBP1 in cells or individuals of porcine origin in the  
69 duration of viral infection is needs to be further investigated.

70 Although vaccines have been widely used to control CSFV infections in population,  
71 sporadic individuals occurred continuously<sup>[5, 6, 18]</sup>. To fundamentally counteract with  
72 the consequence caused by CSFV, more effective and endogenous strategies are needed  
73 to be adopted. Genetic modification in pigs is one of efficacious strategies that has been  
74 adopted to generate pigs with resistance to various swine viruses, such as PRRSV<sup>[19, 20]</sup>,  
75 TGEV<sup>[21]</sup> using CRISPR/Cas9 technology. Hence, based on the host factors hijacked  
76 by corresponding viruses which play critical roles in viral entry, internalization, and  
77 replication, creating pigs with viral resistance via knockout method is promising.

78 Herein, we knock out *PCBP1* gene in PK-15 cells as well as primary porcine fibroblasts  
79 (PFFs) using CRISPR/Cas9 technology and characterize the anti-CSFV ability of  
80 *PCBP1* KO cell clones. Meanwhile, we generate *PCBP1*<sup>-/+</sup> pigs through somatic cell  
81 nuclear transfer (SCNT) with *PCBP1* KO PFFs. Additionally, the effect of PCBP1  
82 deficiency on the IFN- $\alpha$  pathway and predicted interactors of PCBP1 after CSFV  
83 infection was also explored.

## 84 **Results**

## 85 **Generation of *PCBP1* knockout PK-15 cells**

86 First of all, the *PCBP1* relative expression in various porcine organs was detected (Fig.  
87 2a). Within N terminus of the only exon in *PCBP1* locus, two 20-base-pair (bp)  
88 sequence were selected (Fig. 2b). Based on both crRNA sequence, pX330 plasmids  
89 expressing different guide RNAs were created which were designated as sg97 and sg95  
90 respectively (Fig. 2b). The cleavage efficiency of both sgRNAs were monitored via  
91 transient electrotransfection into PK-15 cells (Fig. 1a). As shown in Fig. 2c and 2d,  
92 although the efficiency of sg97 was slightly higher than that of sg95, both of them were  
93 allowed to participate in following investigation.

94 To select and identify *PCBP1* KO clones, sg97 and sg95 were separately  
95 electrotransfected into PK-15 cells. *PCBP1* KO positive clones were selected with  
96 limited dilution method. Total 49 clones were detected and 5 positive clones were  
97 obtained. As shown in Fig. 3a, a subset clones were examined through T7 endonuclease  
98 I (T7E1) assay in which 15#, 25#, and 27# were sg97-producing positive clones and  
99 40# and 46# were sg95-producing positive clones. To verify the genotype of positive  
100 clones, we performed T-cloning and Sanger sequencing using specific primers  
101 amplifying segment containing sgRNA-targeting region. Three positive *PCBP1* KO  
102 clones were chosen to perform further research. Ten bp proximal to PAM sequence were  
103 deleted in 15# clone and 1 bp was deleted in 27# which were compound heterozygous  
104 *PCBP1* KO clones. Otherwise, as for sg95-producing positive 40#, homozygous clone,  
105 a T and a A were respectively inserted into each chromosome locus (Fig. 3b).

106 To confirm the loss of *PCBP1* expression in above selected positive clones, western  
107 blot was performed. As shown in Fig. 3c, *PCBP1* deficiency occurred not only in  
108 homozygous KO clone (40#) but also in heterozygous clones (15# and 27#) in  
109 comparison with the wild type PK-15. Eventually, gray intensity value analysis of  
110 corresponding band also indicated that *PCBP1* level in KO clones was notably reduced  
111 compared to that in WT cells. These data above demonstrated that *PCBP1* was  
112 successfully knocked out in PK-15 cells and several positive KO clones were obtained.

113

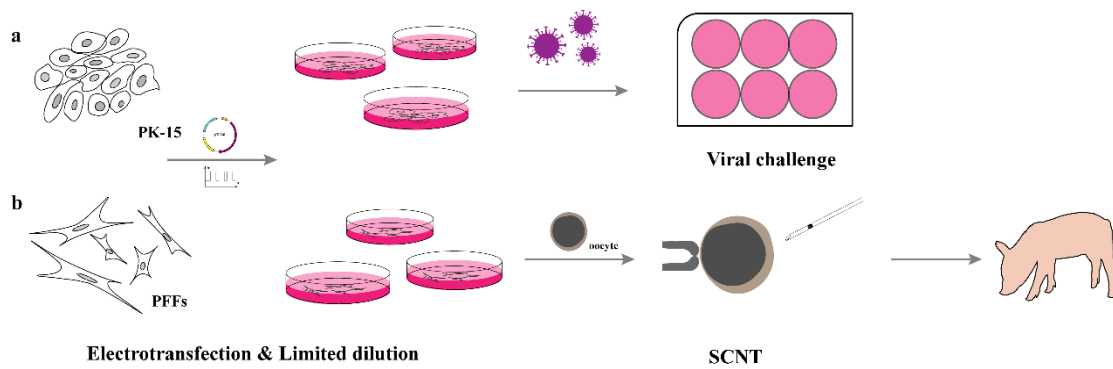

114

115 **Fig. 1 The overall design of this study. (a)** The screen of sgRNA with high efficiency  
116 and the selection of PK-15 positive clone, as well as viral challenge assay in vitro. **(b)**  
117 The circuit of generation of gene-editing piglets.  
118

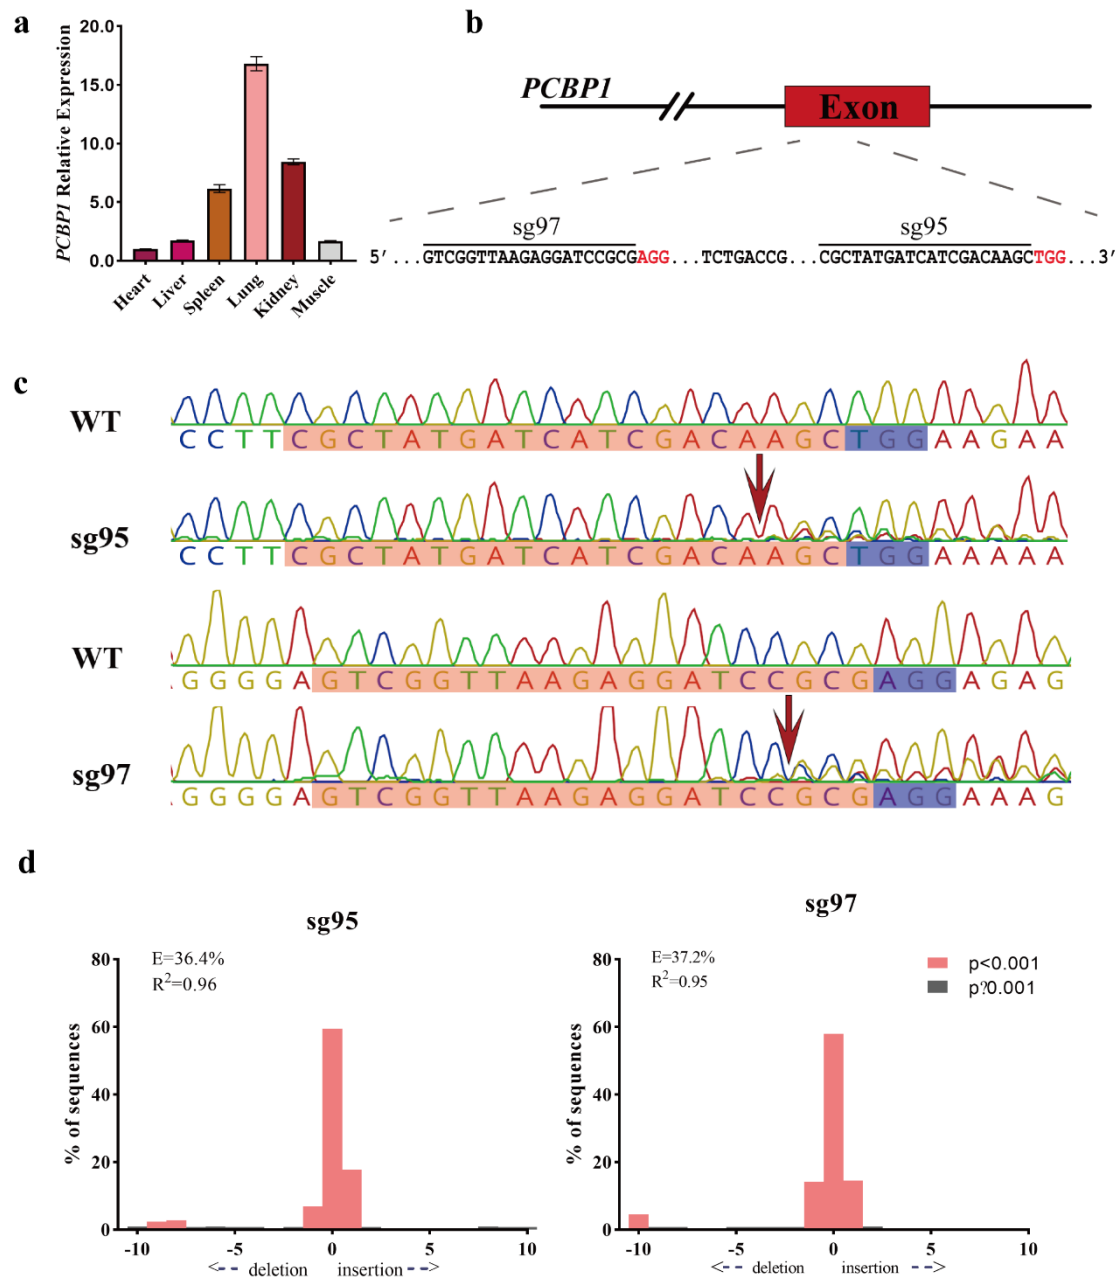

119

120 **Fig. 2 The screen of sgRNA.** (a) The relative expression level of *PCBPI* in various  
 121 organs from Large White piglet was determined by RT-qPCR. (b) The targeting diagram  
 122 of representative sgRNAs on *PCBPI* locus. The red bases indicate PAM sequence. (c)  
 123 The corresponding cutting efficiency of sgRNAs in b is analyzed by Sanger sequencing.  
 124 The red arrow indicates the cleavage site of Cas9 protein. The bases in purple rectangle  
 125 are PAM sequence. The bases in orange rectangle are crRNA sequence. (d) The  
 126 cleavage efficiency of corresponding sgRNAs in b are visualized using TIDE.

127

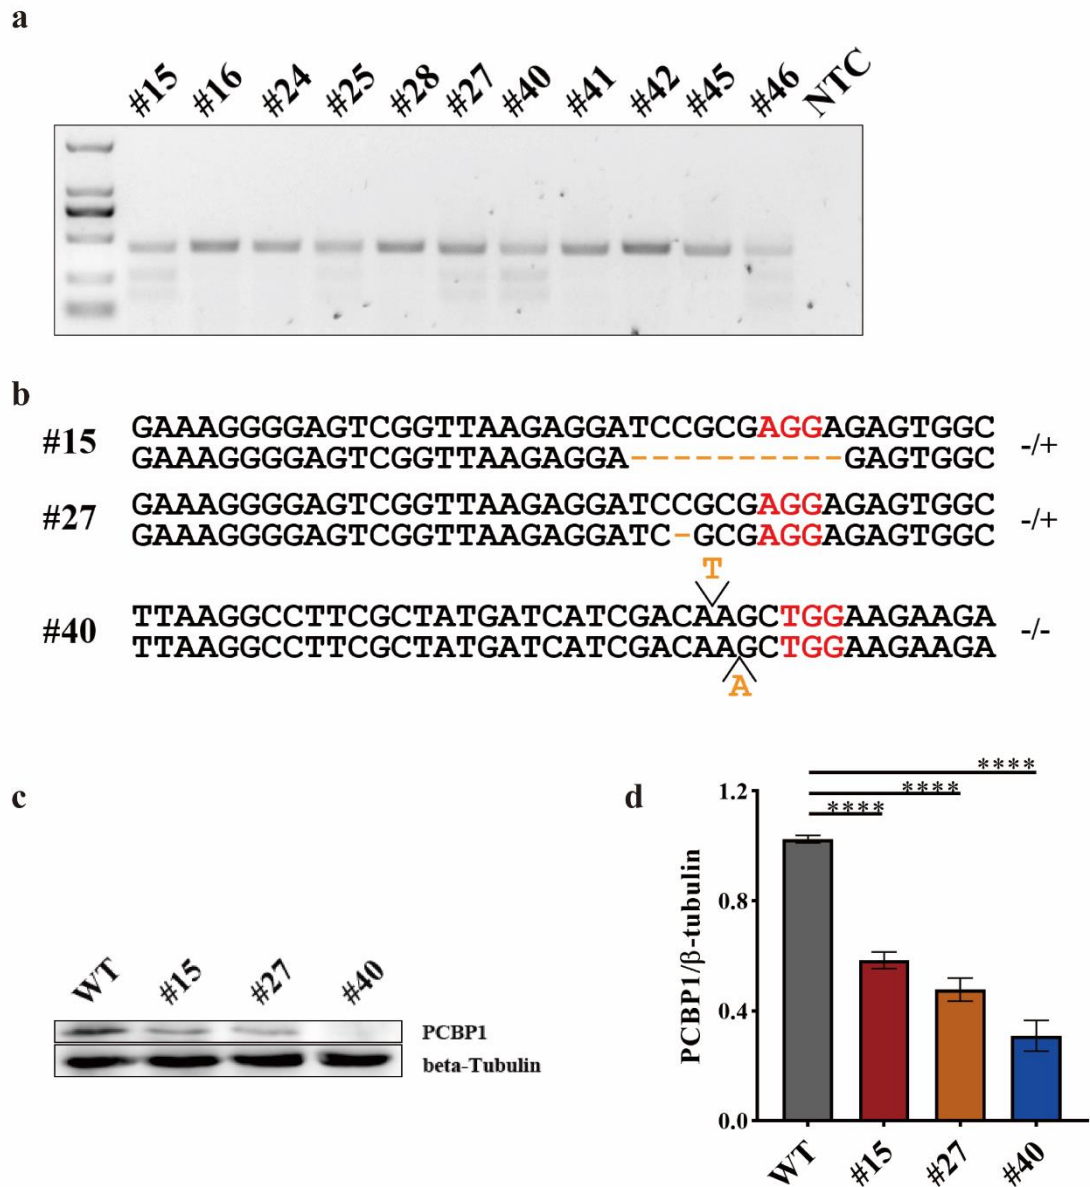

128

129 **Fig. 3 The screen of *PCBP1* KO clones in PK-15 cells.** (a) The cleavage efficiency in  
 130 various selected clones are detected by T7E1 cleavage assay. M, DL2000, has been  
 131 used to indicate band size. (b) T-cloning and Sanger sequencing of editing *PCBP1*  
 132 alleles in different type of positive clones. PAM sites are highlighted in red. Indels are  
 133 shown in yellow. (c) Endogenous *PCBP1* level of various positive KO clones was  
 134 determined by western blotting. (d) The gray intensity analysis of *PCBP1*. *PCBP1* band  
 135 intensity was normalized to that of beta-tubulin in the same sample. Every sample was  
 136 measured three times by ImageJ. Bars are presented as mean  $\pm$  SEM and data are  
 137 analyzed by Student's *t*-test using Graphpad Prism 8.0. \* $p < 0.05$ ; \*\* $p < 0.01$ ; \*\*\* $p <$   
 138  $0.001$ ; \*\*\*\* $p < 0.0001$ ;  $n = 3$ .

139

140

141 ***PCBP1* KO PK-15 cells inhibit CSFV proliferation but not PRV and PEDV**

142 To explore the antiviral capability of *PCBP1* KO positive clones, *PCBP1* KO clone  
143 Number 15 and clone Number 40 were infected by several swine viruses. It is reported  
144 that knockdown of *PCBP1* could suppress CSFV growth<sup>[7]</sup>. Hence, quantitative reverse  
145 transcription PCR (RT-qPCR) was performed to detect the number of viral genomes at  
146 various hours post-infection (hpi) firstly. The magnitude of CSFV genome was  
147 significantly reduced in #15 and #40 compared to WT from 12 hpi to 48 hpi (Fig. 4a).  
148 This finding coincided with the immunofluorescence assays showing that the  
149 expression of the CSFV-encoded E2 protein in *PCBP1* KO cells was reduced following  
150 CSFV infection (Fig. 4d). The fluorescence intensity indicated that viral load in *PCBP1*  
151 KO clone was less than that in WT (Fig. 4e). Meanwhile, the magnitude of CSFV  
152 genome in corresponding time point was consistent with IFA result (Fig. 4f). Then,  
153 PEDV and PRV challenge were also performed comparable with CSFV. However, the  
154 level of viral genomes in *PCBP1* KO clones was consistent with WT for PEDV (Fig.  
155 4b) and PRV (Fig. 4c). The viral load of PRV at various time point was chaotic probably  
156 due to the cytopathic effect (CPE). Taken together, these results suggest that *PCBP1*  
157 knock out could significantly inhibit CSFV growth in PK-15 cells.

158



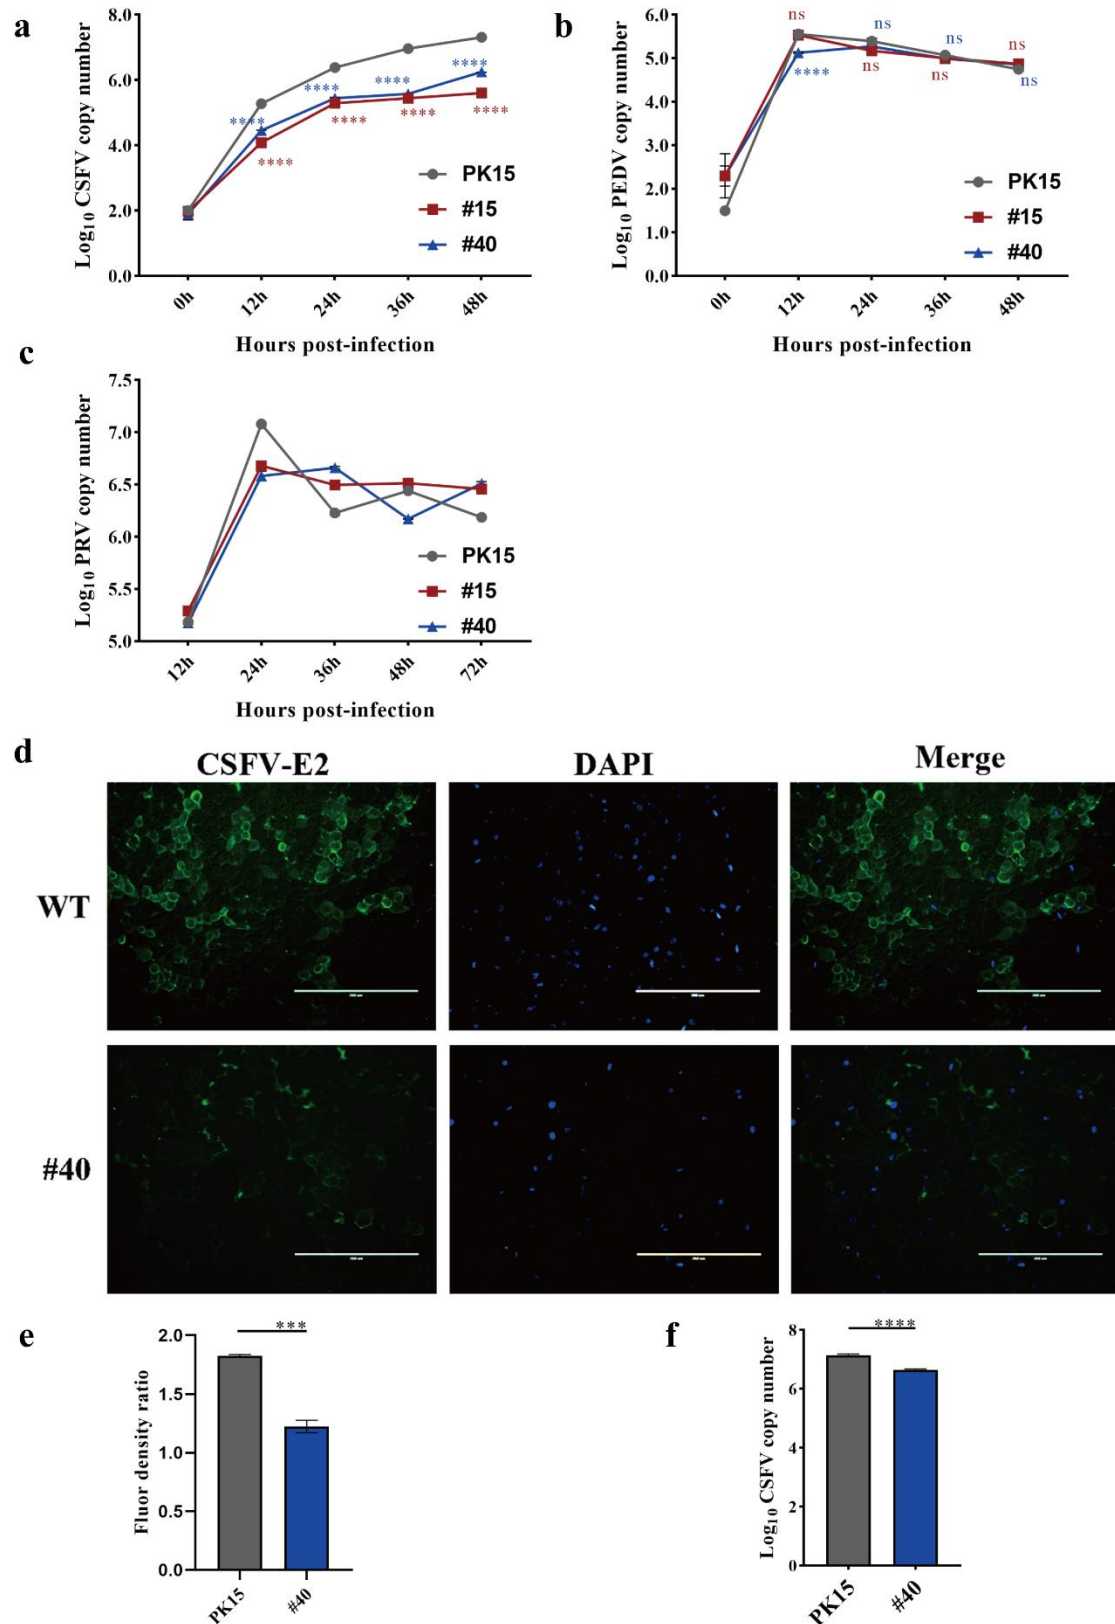

159

160 **Fig. 4 PCBP1 knockout could reduce CSFV infection but not PRV and PEDV.**

161 (a) The proliferation kinetics of CSFV in PCBP1 KO positive clones at various time

162 points post-infection. (b) The proliferation kinetics of PEDV in PCBP1 KO positive

163 clones at various time points post-infection. (c) The proliferation kinetics of PRV in  
164 PCBP1 KO positive clones at various time points post-infection. (d) Viral resistance to  
165 CSFV was examined by IFA. (e) The mean fluorescence intensity in d was analyzed by  
166 ImageJ. (f) The copy number of CSFV genome at the same hpi with d was detected by  
167 RT-qPCR. Bars are presented as mean  $\pm$  SEM and data are analyzed by Student's *t*-test  
168 using Graphpad Prism 8.0. \* $p < 0.05$ ; \*\* $p < 0.01$ ; \*\*\* $p < 0.001$ ; \*\*\*\* $p < 0.0001$ ; ns,  
169 no significance;  $n = 3$ .

170

### 171 **PCBP1 knockout potentiates innate antiviral responses stimulated by CSFV in** 172 **PK-15 cells**

173 To further investigate the mechanism of inhibition for CSFV but not for PEDV in  
174 PCBP1 KO cell line, we detected the relative expression level of several type I  
175 interferon (IFN) genes, such as IFN- $\alpha$  and IL-6 prior to the ISGs in PCBP1 KO  
176 cells. Clone 40# was chosen as following objective cell line. Compared to that in PEDV-  
177 infecting groups, the transcription level of IFN- $\alpha$  and IL-6 in CSFV-infecting  
178 groups was increased around 8-fold and 2-fold respectively (Fig. 5a). Progressively, the  
179 transcription level change of various interferon-stimulated genes that have antiviral  
180 activity against a board range of viruses was further explored. As shown in Fig. 5b, the  
181 relative expression of effector genes, downstream genes of interferon, were universally  
182 higher than that in PEDV-infecting cells.

183 Additionally, in order to observe the alteration of interplay relative to PCBP1, we  
184 searched for the interactors of PCBP1 using STRING database<sup>[22, 23]</sup>, and the top six  
185 predicted genes were shown in Fig. 5c. Interestingly, all of these predicted genes were  
186 more up-regulated in CSFV-infecting 40# clone than PEDV-infecting samples. Taken  
187 together, the cytokines of innate immunity induced by CSFV in PCBP1 KO cells were  
188 more intensive than that stimulated by PEDV.

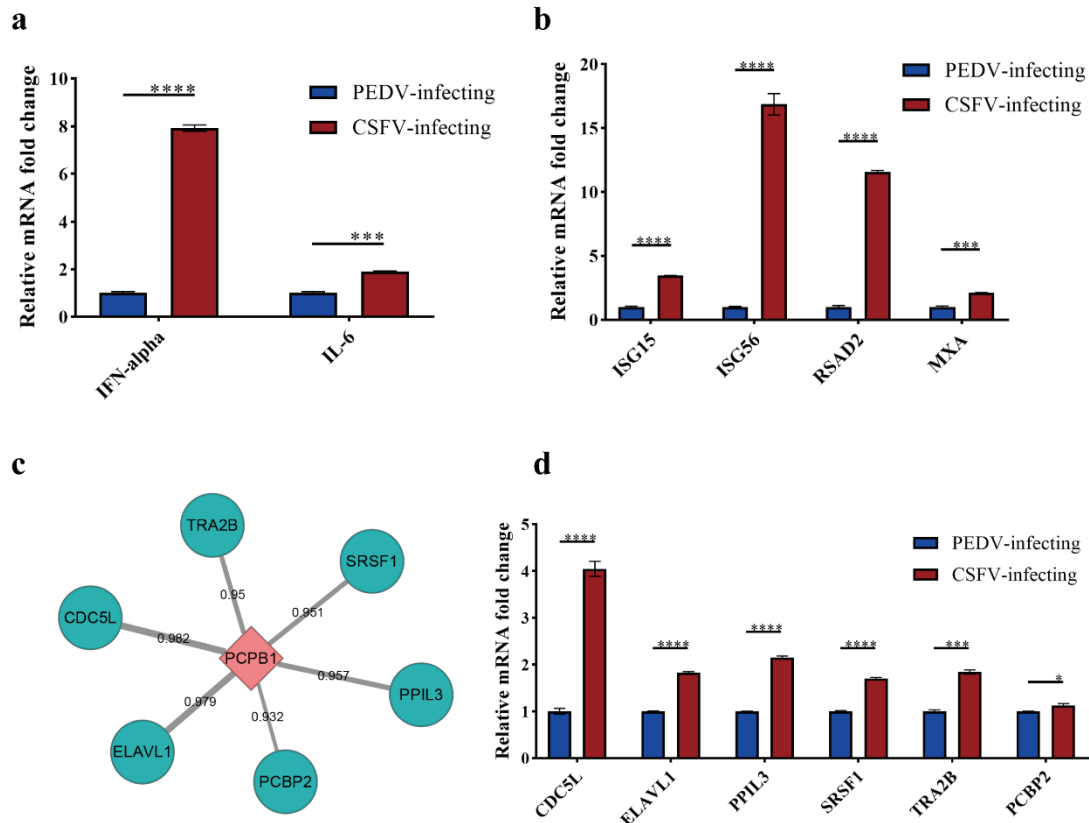

189

190 **Fig. 5 The alteration of IFN associated effectors and predicted genes related to**  
 191 **PCBP1.** The relative mRNA fold change of IFN pathway genes (a) or the downstream  
 192 effectors (b) assessed in *PCBP1*<sup>-/-</sup> PK-15 clone using RT-qPCR at 36 h postinfection.  
 193 (c) The predicted interactors of PCBP1. The thickness of the gray line represents  
 194 combined score. (d) The relative mRNA fold change of predicted genes assessed in  
 195 *PCBP1*<sup>-/-</sup> PK-15 clone using RT-qPCR at 36 h postinfection. PEDV-infecting  
 196 samples were used as reference samples. Bars are presented as mean ± SEM and data are  
 197 analyzed by Student's *t*-test using Graphpad Prism 8.0. \**p* < 0.05; \*\**p* < 0.01; \*\*\**p* <  
 198 0.001; \*\*\*\**p* < 0.0001; ns, no significance; *n* = 3.

199

## 200 Primary fibroblasts derived from PCBP1 KO pigs diminish CSFV infection

201 Our major goal in this research was to generate a herd of *PCBP1* KO pigs, which could  
 202 inhibit CSFV infection. To achieve this purpose, *PCBP1* KO PFFs should be produced  
 203 firstly (Fig. 1b). The sg97 were introduced into Large White PFFs and the positive  
 204 clones were selected comparable with the operation in PK-15 cells. Prior to SCNT, cell  
 205 viability of *PCBP1* KO PFFs were monitored by CCK8. As shown in Fig. 6a, knockout  
 206 of *PCBP1* in PFFs did not exert notable adverse effects. The *PCBP1* KO PFF clone was  
 207 used as donor cells for SCNT and total 921 matured reconstructed embryos were

208 transferred into five surrogates. The piglets were born after around 114 days of  
209 pregnancy, two of which were shown in Fig. 6b and three of them were identified as  
210 positive heterozygous *PCBPI* KO pigs by PCR and Sanger sequencing (Fig. 6c). To  
211 elucidate the effect of knockout on genome of F<sub>0</sub> pigs, off-target sites located on  
212 different chromosomes were predicted using RGEN tools and no obvious off-target  
213 events occurred as shown in Fig. 7a and 7b.

214 To expand the herd of *PCBPI* KO pigs, the female of F<sub>0</sub> generation mated with wild  
215 type herd boar while the positive pigs grown to the estrus period. Recently, the offspring  
216 of F<sub>0</sub> generation was born and the alleles of *PCBPI* were also confirmed by Sanger  
217 sequencing as above. In order to verify the anti-CSFV ability, primary fibroblasts  
218 isolated from tail tips of *PCBPI*<sup>-/+</sup> F<sub>0</sub> and F<sub>1</sub> were infected by CSFV for 36 h. As shown  
219 in Fig. 6f, the magnitude of CSFV in *PCBPI* KO PFFs was significantly decreased in  
220 comparison with that in WT. The similar result was further indicated by IFA (Fig. 6d  
221 and 6e). Altogether, we prepared *PCBPI*<sup>-/+</sup> pigs and expanded the herd of it, which had  
222 the potential to inhibit the proliferation of CSFV.

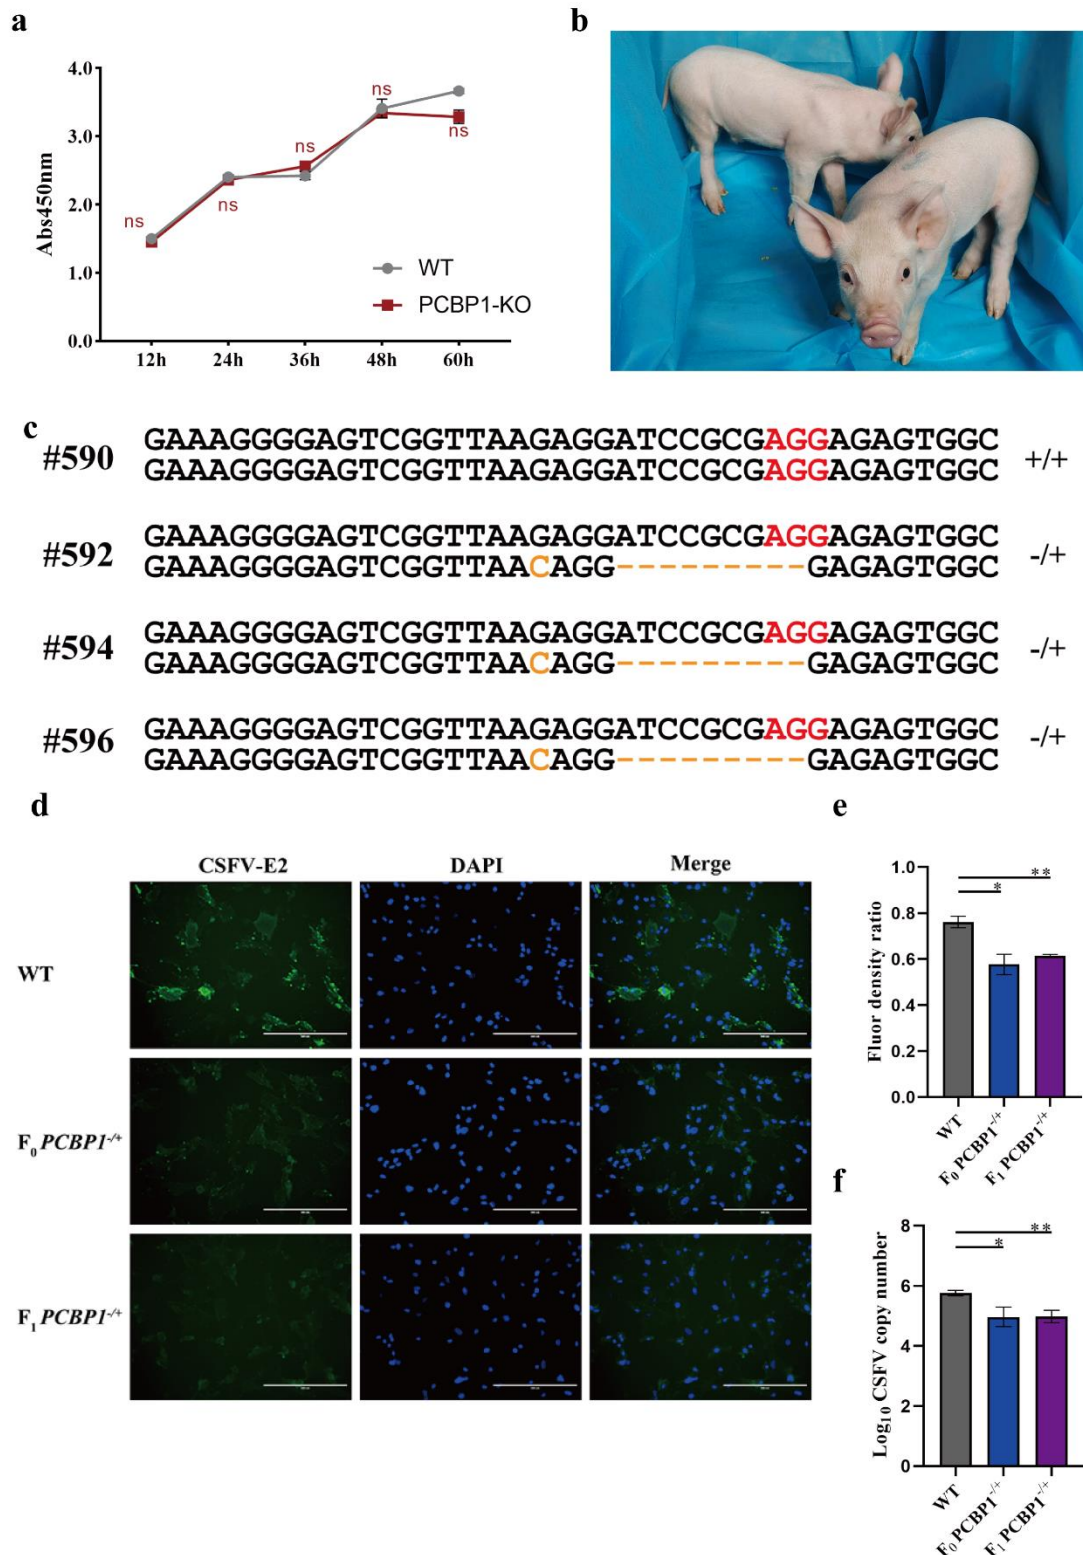

223

224 **Fig. 6 Production of *PCBP1*<sup>-/-</sup> pig.** (a) The cell viability of *PCBP1* KO PFFs. (b)  
 225 Photograph of F<sub>0</sub> *PCBP1*<sup>-/-</sup> piglets. (c) T-cloning and Sanger sequencing of *PCBP1*  
 226 alleles in F<sub>0</sub> piglets. (d) The anti-CSFV ability of F<sub>0</sub> and F<sub>1</sub> pigs was detected using  
 227 primary tail fibroblasts by IFA. (e) The mean fluorescence intensity in d was analyzed  
 228 by ImageJ. (f) Genomic replication of CSFV in primary tail fibroblasts of F<sub>0</sub> and F<sub>1</sub>

229 pigs was detected by RT-qPCR at 36 hpi. Bars are presented as mean  $\pm$  SEM and data  
 230 are analyzed by Student's *t*-test using Graphpad Prism 8.0. \* $p < 0.05$ ; \*\* $p < 0.01$ ; \*\*\* $p$   
 231  $< 0.001$ ; \*\*\*\* $p < 0.0001$ ; ns, no significance;  $n = 3$ .

232

a

|     | Target sequence       | PAM | Locus           |
|-----|-----------------------|-----|-----------------|
| T   | GTCGGTTAAGAGGATCCGCG  | AGG |                 |
| OT1 | TGGGTGATAGAGGATCTGCG  | AGG | Chr2:-72350430  |
| OT2 | TGGGTTAAGAGGATCTAGCAT | TGG | Chr5:-34505574  |
| OT3 | TGGGTTAACAGGATCCTGTG  | TGG | Chr4:+8961043   |
| OT4 | GCGGTGAAGAGGATCCTGAG  | TGG | Chr5:-519268    |
| OT5 | TGGGTTAAAAGGATCCAGCAT | TGG | Chr7:-81248002  |
| OT6 | TCTGGTTAAGAGGATTTGGG  | TGG | Chr11:-51261645 |
| OT7 | ACAGTAAAGAGGATCCAGCG  | GGG | Chr9:-103363128 |
| OT8 | TGGGTTAAAAGGATCCAGCAT | TGG | X:-8980650      |

b

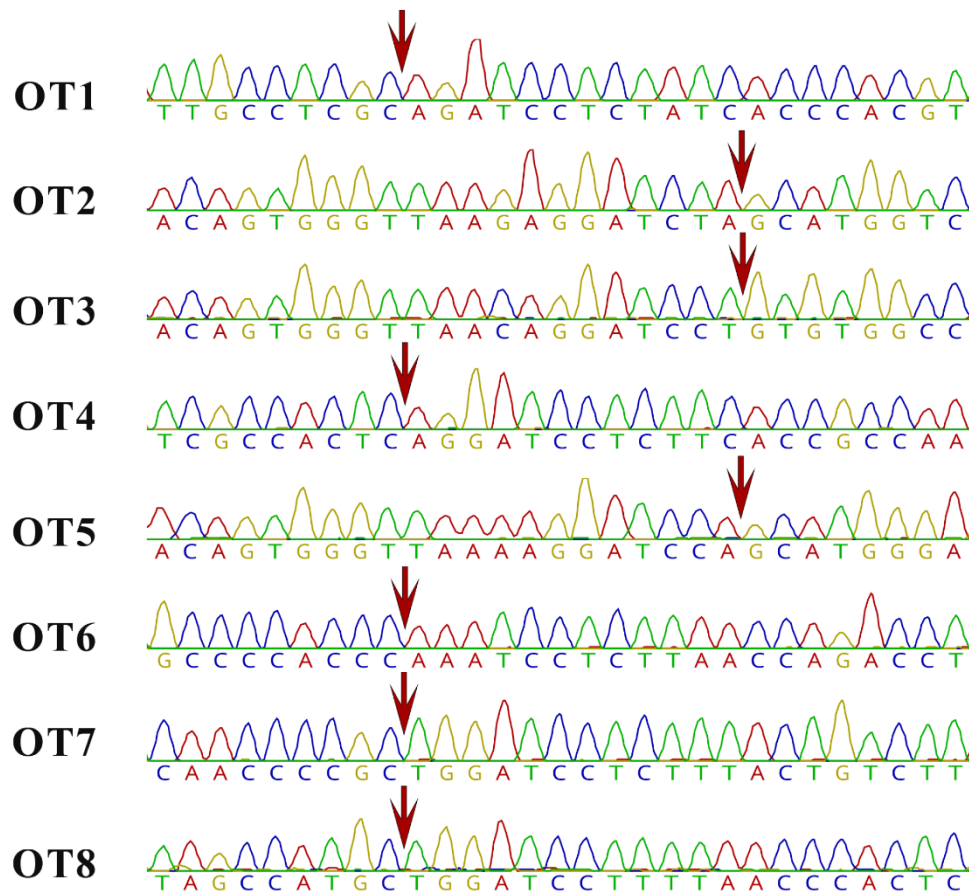

233

234 **Fig. 7 Off-target analysis.** (a) The target site (T) and eight predicted off-target sites

235 (OT) of sg97. OT1~OT8 indicates eight off-target sites and T represents target site. (b)  
236 Sanger sequencing results of PCR amplicons of each off-target site. The red arrow  
237 indicates the potential cleavage sites.

## 238 Discussion

239 CSFV, the pathogen of CSF which is characterized by multiple hemorrhages,  
240 leukopenia, high fever, abortion, and neurological dysfunction<sup>[1, 24]</sup>, has caused  
241 significant economic losses worldwide. Production of transgenic pigs is one of the  
242 powerfully effective strategies to contain viral infection by alteration of immune state  
243 genetically which has been widely utilized to resist various porcine viruses<sup>[25-28]</sup>. While  
244 different types of genetically modified pigs were generated via exploiting the key host  
245 factors responding to viral infection<sup>[29, 30]</sup>, the pigs of endogenous restricted factors  
246 knockout rarely occurred. In this reported, we targeted the *PCBP1* locus in porcine  
247 genome using CRISPR/Cas9 technology and successfully acquired *PCBP1* KO PK-15  
248 cell line and *PCBP1*<sup>-/+</sup> individual pigs. In vitro and ex vivo viral challenge both  
249 illustrated that *PCBP1* KO cells could significantly reduce CSFV infection. To the best  
250 of our knowledge, this study is the first report of *PCBP1* knockout pigs with the  
251 resistance to CSFV.

252 It was proposed that heterozygous *PCBP1* in mouse displayed a mild and nondisruptive  
253 defect in initial postpartum weigh<sup>[15]</sup>. However, the F<sub>0</sub> generation of *PCBP1*<sup>-/+</sup> pigs  
254 exhibited normal birth weight and phenotype which may demonstrate that *PCBP1* plays  
255 divergent roles in the duration of development between mouse and pigs. A previous  
256 report indicated that overexpression of *PCBP1* could enhance CSFV growth and  
257 reasoned that the deletion of KHIII would cause *PCBP1* incorrect folding, leading to  
258 abrogation of *PCBP1*-N<sup>pro</sup> interaction<sup>[7]</sup>. Profressively, we provide a possible  
259 hypothesis that the precise amino acid residue position or positions which play an  
260 important role in the interaction with N<sup>pro</sup> may locate on the KHIII domain. The base  
261 editing library screen derived from CRISPR/Cas9 technology is developing with a high  
262 speed and has been widely used<sup>[31-33]</sup>. Comprehensive screen of the precise amino acid

263 in PCBP1 with saturation editing is perspective for addressing specific sites interacting  
264 with N<sup>pro</sup> and exploitation of targeted drugs.

265 Type I interferon (IFN) has antiviral activity and RNA viruses of the family Flaviviridae  
266 are sensitive to type I IFN<sup>[5, 34]</sup>. Besides, Activation of type I IFN could induce synthesis  
267 of hundreds of proteins such as interferon-stimulated genes (ISGs) <sup>[34, 35]</sup>. It was  
268 suggested that CSFV N<sup>pro</sup> was involved in inhibition of type I IFN by interaction with  
269 IRF3<sup>[36, 37]</sup>. Our data demonstrated that type I IFN genes and the downstream ISGs such  
270 as ISG15, ISG56, and RSAD2, all of which were well-documented to inhibit a broad  
271 spectrum of viruses<sup>[35, 38-41]</sup>, were increased following CSFV infection in PCBP1  
272 deficient PK-15 cells, implying the enhancement of cellular innate immunity. In terms  
273 of the literature above and our results, we speculate that PCBP1 may involve in the  
274 process of N<sup>pro</sup> inhibition against type I IFN. In undisturbed infection states, PCBP1  
275 participates in the conformation of N<sup>pro</sup>-IRF3 complex to suppress type I IFN induction  
276 and the activation of downstream effectors. However, deficiency of PCBP1 blocks the  
277 conformation of N<sup>pro</sup>-IRF3 complex, which limits the reduction of type I IFN cascade  
278 reaction. A previous report illustrated that knockdown of PCBP1 promoted the increase  
279 of type I IFN in cells infected with SeV or transfected with poly (I:C)<sup>[14]</sup>, which  
280 confirmed our speculation to a certain degree. However, the function of PCBP1 in  
281 process of CSFV counteracting cellular immune system infection is still unclear.  
282 Differently, it is reported that type III IFNs play critical roles in innate antiviral  
283 immunity in intestinal epithelial cells in the gut<sup>[42, 43]</sup>. We reason that the depletion of  
284 PCBP1 do not influence the immune responses following PEDV infection because  
285 PCBP1 may not be included in type III IFN cascade reaction.

286 To further explore the post alteration of relevant genes due to deficiency of PCBP1 in  
287 the presence of CSFV, we predicted the interactors of PCBP1 using STRING database.  
288 Among the predicted genes, it was proposed that overexpression of several interactors  
289 such as ELAVL1 and SRSF1 would decrease the level of adenovirus, ZIKV, and HIV-  
290 1, etc.<sup>[44-47]</sup>, implying the property of these genes of inhibiting viral infection. Our



291 results illustrated that CDC5L, ELAVL1, and SRSF1, etc. were universally upregulated  
292 after CSFV stimulation which may be restricted factors relative to PCBP1 in the  
293 duration of CSFV infection. PCBP1 hijacked by N<sup>pro</sup> or other CSFV proteins suppress  
294 the activation of some antiviral pathways including above detected factors. The removal  
295 of inhibition leads to the upregulation of ELAVL1 and SRSF1, etc. following CSFV  
296 infection due to the deficiency of PCBP1.

297 Recently, the PCBP1 knockout pigs of F<sub>1</sub> generation, offspring of heterozygous 592#,  
298 was successfully produced. As expected, ex vivo cultured primary cells isolated from  
299 F<sub>1</sub> generation still displayed significant anti-CSFV capability. Unfortunately, the first  
300 litter was so small that the following research cannot be performed. The herd of *PCBP1*  
301 KO pigs is strictly monitored until the scale of research recipients is large enough to  
302 execute following experiments and individual level schedule concerning in vivo viral  
303 challenge is preparing now. In further future, the ex vivo results will be directly  
304 translated into in vivo model promisingly.

305 In summary, the PCBP1 knockout pigs are not only a valuable animal model for further  
306 investigating infection mechanisms of CSFV but also hold the potential to reduce  
307 economic losses related to CSFV in swine industry.

## 308 **Materials and Methods**

309 **Cell Lines and Culture Conditions.** Porcine kidney cell line-15 (PK-15) cells (ATCC  
310 Number: CCL-33) were cultured in Dulbecco's modified Eagle's medium (DMEM,  
311 Gibco) supplemented with 5% fetal bovine serum (FBS), 10 Unit/mL penicillin, 10  
312 µg/mL streptomycin, 1% Non-Essential Amino Acids (NEAA, Gibco), and 2 mM L-  
313 Glutamine (Gibco). Primary porcine fatal fibroblasts (PFFs) were cultured in DMEM  
314 containing 15% FBS, 10 Unit/mL penicillin, 10 µg/mL streptomycin, 1% NEAA, and  
315 2mM L-Glutamine. All cells were grown in an atmosphere of 5% CO<sub>2</sub> at 37°C.

316 **Viruses.** CSFV Shimen strain and PRV (Suid herpesvirus 1) were used and maintained  
317 at -80°C. PEDV attenuated vaccine was purchased from Jilin Zhengye Biological  
318 Products CO., LTD. All attenuated virus in dry powder form was stored at 4°C and the

319 stock solution was preserved at  $-80^{\circ}\text{C}$ .

320 **Plasmid Construction.** CrRNA sequence was searched through the porcine *PCBP1*  
321 gene using the CHOPCHOP webtools (<https://chopchop.cbu.uib.no/>). CACC sequence  
322 was added at 5' end of the top strand of selected crRNA sequences and AAAC was  
323 added at 5' end of the bottom strand. These sgRNA oligonucleotides were synthesized  
324 by Comate Bioscience CO., LTD and ligated into the Bbs I sites of pX330 vector (42230,  
325 Addgene) to form the intact targeting plasmids.

326 **Electroporation and Generation of Knock Out Cell Clones.** Approximately  $30\ \mu\text{g}$   
327 pX330 plasmids containing crRNAs targeting different region of porcine PCBP1 gene  
328 were electrotransfected into  $\sim 3 \times 10^6$  PFFs using Neon Transfection System  
329 (invitrogen). The specified parameters applied to PFFs uniquely were as follows: 1260  
330 voltage, 30ms, 1 pulse. Similarly,  $30\ \mu\text{g}$  pX330 plasmids were introduced into  $\sim 3 \times 10^6$   
331 PK-15 cells resuspended in  $300\ \mu\text{L}$  Opti-MEM (Gibco) in 2 mm gap cuvettes using  
332 BTX-ECM 2001. The parameters were as follows: 300 voltage, 1 ms, 3 pulses, 1 repeat.

333 The PFFs and PK-15 cells were seeded into ten 100mm dishes after 48 hours post-  
334 transfection, and the inoculation density per dish was 2000 cells on average. The cell  
335 clones were picked and continually cultured in 24-well plates. Forty percent cells per  
336 well were digested for 2 min at  $37^{\circ}\text{C}$  and lysed with  $10\ \mu\text{L}$  NP-40 lysis buffer (10 mM  
337 Tris-HCl pH 8.3, 50 mM KCl, 1.5 mM  $\text{MgCl}_2$ , 1% NP-40, and 1% protease K ) for 1 h  
338 at  $56^{\circ}\text{C}$  and 10 min at  $95^{\circ}\text{C}$  after each clone reaching into 80% confluency. The lysate  
339 was used as PCR template and subjected to Sanger sequencing. The positive PK-15  
340 clones were propagated into 100 mm dishes one step at a time. The positive PFFs clones  
341 were grown on 24-well plates until SCNT.

342 **T7E1 assay.** Genomic DNA of positive PFFs clones was extracted using TIANamp  
343 Genomic DNA Kit (TIANGEN). And a conventional PCR was performed as follows:  
344  $95^{\circ}\text{C}$  for 4 min;  $95^{\circ}\text{C}$  for 30 s,  $59^{\circ}\text{C}$  for 30s,  $72^{\circ}\text{C}$  for 30s, for 35 cycles;  $72^{\circ}\text{C}$  for 5  
345 min; hold at  $4^{\circ}\text{C}$ . The PCR products were purified using QIAquick PCR Purification  
346 Kit (Qiagen). Approximately 200 ng purified PCR products mixed with  $10 \times$  NEB

347 Buffer 2 were hybridized using following cycles: 95°C for 5 min; 95-85°C at the rate  
348 of -2°C/s, 85-25 at the rate of -0.1°C/s; hold at 4°C. Then, 1 µL T7 endonuclease was  
349 added to each sample and the reactions were incubated at 37°C for 15 min. the reaction  
350 mixtures were then analyzed on a 2% agarose gels.

351 **Virus infection.** The in vitro viral challenge assay was stringently performed and  
352 monitored at a designated safe place. The positive clones or primary PPFs were seeded  
353 in 6-well plates. For CSFV and PRV infection, cells were replaced with fresh culture  
354 medium after incubating for 1 h at a multiplicity of infection (MOI) of 20 and 50  
355 respectively. For attenuated PEDV infection, the absorption phase was maintained for  
356 1 h at a MOI of 10 in the presence of 10 µg/mL trypsin, after which the maintenance  
357 medium containing 10 µg/mL trypsin was added. At various time points postinfection,  
358 samples containing viral genome were harvested and stored at -80°C until use.

359 **Viral genome extraction and Real-Time quantitative PCR.** As for CSFV, total  
360 cellular RNA was extracted from CSFV-infecting PK-15 cells or positive clones using  
361 TRNzol Universal Reagent (TIANGEN) and ~2 µg RNAs were performed to reverse  
362 transcript to the first-strand cDNAs using FastKing RT Kit (TINAGEN) according to  
363 manufacturer's instruction. As for PEDV and TGEV, the monolayer of virus-infected  
364 cells were scraped by cell scraper within the culture medium and 200 µL suspension  
365 was aspirated and mixed with 800 µL TRNzol Universal Reagent. The subsequent  
366 reverse transcription was consistent with the above. As for PRV, the virus-infected  
367 material was obtained in the same manner as PEDV and TGEV. And the PRV genome  
368 within 200 µL suspension was extracted by TIANamp Virus DNA/RNA Kit  
369 (TIANGEN). All cDNAs and viral genome were -20°C.

370 To detect the accurate viral copy number in virus-infected materials, a standard curve  
371 was generated with 10-fold serial dilutions ranging from 10<sup>9</sup> to 10<sup>3</sup>. The quantitative  
372 PCR was performed using Quantagene q225 (KUBOTECHNOLOGY) with SuperReal  
373 PreMix Plus (TIANGEN) according to the manufacturer's instruction. To check the  
374 relative expression of predicted genes or genes associated with porcine PCBP1, the

375 housekeeping gene glyceraldehyde 3-phosphate dehydrogenase (*GAPDH*) was selected  
376 as reference gene and the mRNA expression was normalized to *GAPDH* using the  $2^{-\Delta\Delta Ct}$   
377  $\Delta\Delta Ct$  method.

378 **Western Blotting.** The wild type PK-15 and cell clones were washed in ice-cold  
379 phosphate-buffered saline (PBS) and lysed in Cell Lysis Buffer for Western And IP  
380 (P0013, BEYOTIME) in the presence of 1mM PMSF (AR1192, BOSTER) and 1%  
381 Protease Inhibitor Cocktail (P1005, BEYOTIME). The protein concentrations were  
382 measured with the BCA assay Kit (AR1189, BOSTER) and 40  $\mu$ g proteins were diluted  
383 in 5  $\times$  SDS-PAGE Loading Buffer (AR1112, BOSTER) at 95  $^{\circ}$ C for 10 min.  
384 Subsequently, the samples boiled were resolved on the artificial 4~12% SDS-PAGE gel  
385 and the proteins were transferred to nitrocellulose membranes. The membranes were  
386 blocked with 5% skim milk dissolved in TBST for 2 h at room temperature. Primary  
387 antibodies for immunoblotting were as follows: rabbit anti-PCBP1 (1:2000, BOSTER  
388 A02636-1), rabbit anti- $\beta$ -tubulin (1:5000, BOSTER BM3877). Membranes were  
389 subsequently washed in TBST and then incubated with horseradish peroxidase-  
390 conjugated goat anti-rabbit/mouse IgG (H + L) (1:5000, BOSTER BA1056). Ultimately,  
391 membranes were imaged with the ultra-sensitive ECL chemical luminescence ready-to-  
392 use kit (BOSTER AR1197) using Azure c600 (AZUREBIOSYSTEMS). The  
393 corresponding protein bands were normalized to  $\beta$ -tubulin band density using Fiji.

394 **IFA.** The positive clones or primary fibroblast cells isolated from tail tips of the *PCBP1*  
395 <sup>/+</sup> F<sub>0</sub> piglets were seeded into 24-well plates with four replicates per sample. The cells,  
396 reaching 80% confluency, were infected with CSFV (200 TCID<sub>50</sub> per well). At 2 h post-  
397 inoculation, cells were replaced with fresh CSFV-free culture medium. After 36h  
398 inoculation, cells were washed with cold PBS and fixed in 4% paraformaldehyde for  
399 30 min at room temperature. The primary antibodies and fluorophore-conjugated  
400 antibody were as follows: mouse anti-CSFV E2 (1:500, LV DU BIO-SCIENCES &  
401 TECHNOLOGY CO., LTD.), fluorescein (FITC)-conjugated goat anti-mouse IgG (H  
402 + L) (1:500, PROTEINTECH SA00003), and Alexa Fluor 488-conjugated goat anti-

403 mouse IgG (H + L) (1:500, PROTEINTECH SA00006). Samples were incubated with  
404 primary antibodies for 1 h in cold blocking buffer (10%FBS in PBS) at 37°C, followed  
405 by three washes in PBS and incubated with secondary antibodies in a dark, humidified  
406 chamber for 1 h at 37°C. Before imaged with EVOS fl fluorescence microscope,  
407 samples were washed five times with PBS. The semi-quantitative fluorescence intensity  
408 of the target protein was normalized to that of corresponding nucleus using Fiji.

409 **SCNT.** The *PCBP1*<sup>-/+</sup> positive PFFs were used for somatic cell nuclear transfer as  
410 described previously<sup>[48]</sup>. The positive cells were injected into the perivitelline  
411 cytoplasm of enucleated oocytes to form reconstructed embryos. Subsequently,  
412 reconstructed embryos were surgically transferred into the oviducts of surrogate  
413 females on the first day of estrus after activated and cultured for approximately 18 h in  
414 embryo culture medium. Pregnancy status was detected using ultrasound scanner  
415 between 30–35 days post-transplantation. To monitor the blastocyst formation rate and  
416 developmental viability, a part of activated embryos was continually cultured for 7 days.

417 **Isolation of primary porcine fibroblast.** The tail tips from *PCBP1*<sup>-/+</sup> and WT piglets  
418 were cut into small pieces, followed by digested with the fresh culture medium  
419 containing 20% FBS in the presence of 25 Unit/mL DNase I and 200 Unit/mL type IV  
420 collagenase for 4 h at 39 °C. Then, dissociated primary cells and tail pieces were  
421 continually cultured for 4~5 days. The isolated tail fibroblasts were cryopreserved at -  
422 80 °C for 24h, after which moved to liquid nitrogen for long term storage.

423 **Cell viability assay.** cell viability was evaluated with the Cell Counting Kit-8 (AR1160,  
424 BOSTER) according to the manufacturer's instruction. Briefly, the PCBP1 KO PFFs or  
425 WT cells were seeded into 96-well plates at a density of  $5 \times 10^3$  cells/well. The cells  
426 were replaced with fresh culture medium containing 10% CCK-8 reagent until attached  
427 to plates. An additional inoculation were applied for 1 h at 37°C. The absorbance at  
428 450nm was measured using TECAN Infinite 200 PRO.

429 **Statistical analysis.** Statistical analysis was performed using Graphpad Prism 8.0  
430 software. Student t tests were used to compare two groups.  $P < 0.05$  was considered

431 statistically significant.

432 **Acknowledgments**

433 This work was financially supported through grants from the Special Funds for  
434 Cultivation and Breeding of New Transgenic Organisms (No. 2016ZX08006003) and  
435 the Shenzhen Key Technology Projects (JSGG20180507182028625).

436

437

438

439 [1] FAN J, LIAO Y, ZHANG M, et al. Anti-Classical Swine Fever Virus Strategies [J].  
440 Microorganisms, 2021, 9(4): 761.

441 [2] MA S-M, MAO Q, YI L, et al. Apoptosis, Autophagy, and Pyroptosis: Immune  
442 Escape Strategies for Persistent Infection and Pathogenesis of Classical Swine Fever  
443 Virus [J]. Pathogens, 2019, 8(4): 239.

444 [3] POSTEL A, AUSTERMANN-BUSCH S, PETROV A, et al. Epidemiology,  
445 diagnosis and control of classical swine fever: Recent developments and future  
446 challenges [J]. Transboundary and Emerging Diseases, 2018, 65(S1): 248-61.

447 [4] ZHOU B. Classical Swine Fever in China-An Update Minireview [J]. Frontiers in  
448 Veterinary Science, 2019, 6(187):

449 [5] GORAYA M U, ZIAGHUM F, CHEN S, et al. Role of innate immunity in  
450 pathophysiology of classical swine fever virus infection [J]. Microbial Pathogenesis,  
451 2018, 119(248-54).

452 [6] LI S, WANG J, YANG Q, et al. Complex Virus–Host Interactions Involved in the  
453 Regulation of Classical Swine Fever Virus Replication: A Minireview [J]. Viruses, 2017,  
454 9(7): 171.

455 [7] LI D, LI S, SUN Y, et al. Poly(C)-binding protein 1, a novel N(pro)-interacting  
456 protein involved in classical swine fever virus growth [J]. J Virol, 2013, 87(4): 2072-  
457 80.

458 [8] CHOI H S, HWANG C K, SONG K Y, et al. Poly(C)-binding proteins as  
459 transcriptional regulators of gene expression [J]. Biochem Biophys Res Commun, 2009,  
460 380(3): 431-6.

461 [9] GUO J, JIA R. Splicing factor poly(rC)-binding protein 1 is a novel and distinctive  
462 tumor suppressor [J]. J Cell Physiol, 2018, 234(1): 33-41.

463 [10] PATEL S J, FREY A G, PALENCHAR D J, et al. A PCBP1-BolA2 chaperone  
464 complex delivers iron for cytosolic [2Fe-2S] cluster assembly [J]. Nat Chem Biol, 2019,  
465 15(9): 872-81.

- 466 [11]ISHII T, HAYAKAWA H, IGAWA T, et al. Specific binding of PCBP1 to heavily  
467 oxidized RNA to induce cell death [J]. Proc Natl Acad Sci U S A, 2018, 115(26): 6715-  
468 20.
- 469 [12]ISHII T, IGAWA T, HAYAKAWA H, et al. PCBP1 and PCBP2 both bind heavily  
470 oxidized RNA but cause opposing outcomes, suppressing or increasing apoptosis under  
471 oxidative conditions [J]. J Biol Chem, 2020, 295(34): 12247-61.
- 472 [13]LIAO C Y, LEI C Q, SHU H B. PCBP1 modulates the innate immune response by  
473 facilitating the binding of cGAS to DNA [J]. Cell Mol Immunol, 2020,
- 474 [14]ZHOU X, YOU F, CHEN H, et al. Poly(C)-binding protein 1 (PCBP1) mediates  
475 housekeeping degradation of mitochondrial antiviral signaling (MAVS) [J]. Cell Res,  
476 2012, 22(4): 717-27.
- 477 [15]GHANEM L R, KROMER A, SILVERMAN I M, et al. The Poly(C) Binding  
478 Protein Pcbp2 and Its Retrotransposed Derivative Pcbp1 Are Independently Essential  
479 to Mouse Development [J]. Molecular and Cellular Biology, 2016, 36(2): 304-19.
- 480 [16]MAKEYEV A V, CHKHEIDZE A N, LIEBHABER S A. A set of highly conserved  
481 RNA-binding proteins, alphaCP-1 and alphaCP-2, implicated in mRNA stabilization,  
482 are coexpressed from an intronless gene and its intron-containing paralog [J]. J Biol  
483 Chem, 1999, 274(35): 24849-57.
- 484 [17]BEURA L K, DINH P X, OSORIO F A, et al. Cellular poly(c) binding proteins 1  
485 and 2 interact with porcine reproductive and respiratory syndrome virus nonstructural  
486 protein 1beta and support viral replication [J]. J Virol, 2011, 85(24): 12939-49.
- 487 [18]LUO Y, JI S, LIU Y, et al. Isolation and Characterization of a Moderately Virulent  
488 Classical Swine Fever Virus Emerging in China [J]. Transboundary and Emerging  
489 Diseases, 2017, 64(6): 1848-57.
- 490 [19]CHEN J, WANG H, BAI J, et al. Generation of Pigs Resistant to Highly  
491 Pathogenic-Porcine Reproductive and Respiratory Syndrome Virus through Gene  
492 Editing of *CD163* [J]. International Journal of Biological Sciences, 2019, 15(2):  
493 481-92.



- 494 [20]BURKARD C, OPRIESSNIG T, MILEHAM A J, et al. Pigs Lacking the Scavenger  
495 Receptor Cysteine-Rich Domain 5 of CD163 Are Resistant to Porcine Reproductive  
496 and Respiratory Syndrome Virus 1 Infection [J]. *Journal of Virology*, 2018, 92(16):  
497 e00415-18.
- 498 [21]XU K, ZHOU Y, MU Y, et al. CD163 and pAPN double-knockout pigs are resistant  
499 to PRRSV and TGEV and exhibit decreased susceptibility to PDCoV while maintaining  
500 normal production performance [J]. *Elife*, 2020, 9(  
501 [22]SZKLARCZYK D, GABLE A L, NASTOU K C, et al. The STRING database in  
502 2021: customizable protein–protein networks, and functional characterization of user-  
503 uploaded gene/measurement sets [J]. *Nucleic Acids Research*, 2020, 49(D1): D605-  
504 D12.
- 505 [23]SZKLARCZYK D, MORRIS J H, COOK H, et al. The STRING database in 2017:  
506 quality-controlled protein–protein association networks, made broadly accessible [J].  
507 *Nucleic Acids Research*, 2016, 45(D1): D362-D8.
- 508 [24]ZHENG G, LI L-F, ZHANG Y, et al. MERTK is a host factor that promotes  
509 classical swine fever virus entry and antagonizes innate immune response in PK-15  
510 cells [J]. *Emerging Microbes & Infections*, 2020, 9(1): 571-81.
- 511 [25]HU S W, QIAO J, FU Q, et al. Transgenic shRNA pigs reduce susceptibility to foot  
512 and mouth disease virus infection [J]. *Elife*, 2015, 4(  
513 [26]HUANG G P, LIU X Y, TANG X L, et al. Increased Neutralizing Antibody  
514 Production and Interferon-gamma Secretion in Response to Porcine Reproductive and  
515 Respiratory Syndrome Virus Immunization in Genetically Modified Pigs [J]. *Frontiers*  
516 *in Immunology*, 2017, 8(  
517 [27]LU T Y, SON Z Y, LI Q Y, et al. Overexpression of Histone Deacetylase 6 Enhances  
518 Resistance to Porcine Reproductive and Respiratory Syndrome Virus in Pigs [J]. *Plos*  
519 *One*, 2017, 12(1):  
520 [28]YAN Q, YANG H, YANG D, et al. Production of transgenic pigs over-expressing  
521 the antiviral gene Mx1 [J]. *Cell regeneration (London, England)*, 2014, 3(1): 11.

- 522 [29]XIE Z, JIAO H, XIAO H, et al. Generation of pRSAD2 gene knock-in pig via  
523 CRISPR/Cas9 technology [J]. Antiviral Research, 2020, 174(104696).
- 524 [30]ZHAO Y, WANG T, YAO L, et al. Classical swine fever virus replicated poorly in  
525 cells from MxA transgenic pigs [J]. BMC Vet Res, 2016, 12(1): 169.
- 526 [31]ARBAB M, SHEN M W, MOK B, et al. Determinants of Base Editing Outcomes  
527 from Target Library Analysis and Machine Learning [J]. Cell, 2020, 182(2): 463-80.e30.
- 528 [32]CUELLA-MARTIN R, HAYWARD S B, FAN X, et al. Functional interrogation of  
529 DNA damage response variants with base editing screens [J]. Cell, 2021, 184(4): 1081-  
530 97.e19.
- 531 [33]HANNA R E, HEGDE M, FAGRE C R, et al. Massively parallel assessment of  
532 human variants with base editor screens [J]. Cell, 2021, 184(4): 1064-80.e20.
- 533 [34]SCHNEIDER W M, CHEVILLOTTE M D, RICE C M. Interferon-Stimulated  
534 Genes: A Complex Web of Host Defenses [J]. Annual Review of Immunology, 2014,  
535 32(1): 513-45.
- 536 [35]LI C, WANG Y, ZHENG H, et al. Antiviral activity of ISG15 against classical  
537 swine fever virus replication in porcine alveolar macrophages via inhibition of  
538 autophagy by ISGylating BECN1 [J]. Veterinary Research, 2020, 51(1): 22.
- 539 [36]BAUHOFER O, SUMMERFIELD A, SAKODA Y, et al. Classical swine fever  
540 virus Npro interacts with interferon regulatory factor 3 and induces its proteasomal  
541 degradation [J]. J Virol, 2007, 81(7): 3087-96.
- 542 [37]GOTTIPATI K, HOLTHAUZEN L M, RUGGLI N, et al. Pestivirus Npro Directly  
543 Interacts with Interferon Regulatory Factor 3 Monomer and Dimer [J]. J Virol, 2016,  
544 90(17): 7740-7.
- 545 [38]RAYCHOUDHURI A, SHRIVASTAVA S, STEELE R, et al. ISG56 and IFITM1  
546 Proteins Inhibit Hepatitis C Virus Replication [J]. Journal of Virology, 2011, 85(24):  
547 12881-9.
- 548 [39]HELBIG K J, CARR J M, CALVERT J K, et al. Viperin is induced following  
549 dengue virus type-2 (DENV-2) infection and has anti-viral actions requiring the C-

550 terminal end of viperin [J]. PLoS Negl Trop Dis, 2013, 7(4): e2178.

551 [40]VAN DER HOEK K H, EYRE N S, SHUE B, et al. Viperin is an important host  
552 restriction factor in control of Zika virus infection [J]. Scientific Reports, 2017, 7(1):  
553 4475.

554 [41]XIE Z, JIAO H, XIAO H, et al. Generation of pRSAD2 gene knock-in pig via  
555 CRISPR/Cas9 technology [J]. Antiviral Res, 2020, 174(104696).

556 [42]LI L, FU F, XUE M, et al. IFN-lambda preferably inhibits PEDV infection of  
557 porcine intestinal epithelial cells compared with IFN-alpha [J]. Antiviral Research,  
558 2017, 140(76-82).

559 [43]ZHANG Q, KE H, BLIKSLAGER A, et al. Type III Interferon Restriction by  
560 Porcine Epidemic Diarrhea Virus and the Role of Viral Protein nsp1 in IRF1 Signaling  
561 [J]. Journal of Virology, 2018, 92(4): e01677-17.

562 [44]JEHUNG J P, KITAMURA T, YANAGAWA-MATSUDA A, et al. Adenovirus  
563 infection induces HuR relocalization to facilitate virus replication [J]. Biochemical and  
564 Biophysical Research Communications, 2018, 495(2): 1795-800.

565 [45]BONENFANT G, WILLIAMS N, NETZBAND R, et al. Zika Virus Subverts Stress  
566 Granules To Promote and Restrict Viral Gene Expression [J]. Journal of Virology, 2019,  
567 93(12): e00520-19.

568 [46]PAZ S, KRAINER A R, CAPUTI M. HIV-1 transcription is regulated by splicing  
569 factor SRSF1 [J]. Nucleic Acids Research, 2014, 42(22): 13812-23.

570 [47]PAZ S, LU M L, TAKATA H, et al. SRSF1 RNA Recognition Motifs Are Strong  
571 Inhibitors of HIV-1 Replication [J]. Journal of Virology, 2015, 89(12): 6275-86.

572 [48]LAI L, KOLBER-SIMONDS D, PARK K-W, et al. Production of  $\alpha$ -1,3-  
573 Galactosyltransferase Knockout Pigs by Nuclear Transfer Cloning [J]. Science, 2002,  
574 295(5557): 1089-92.

575

576

577

578 Table 1

579 Primers and sequences in this research

| Designation   | Sequence (5'~3')         | Usage |
|---------------|--------------------------|-------|
| PCBP1_F       | AGACTTGACCACGTAACGAGCC   | PCR   |
| PCBP1_R       | CTCTCGCGGATCTCTTTGATCT   |       |
| PCBP1_DL_F    | TCACCGAGTGTGTCAAGCAG     | qPCR  |
| PCBP1_DL_R    | CATGGGTGGCATGAGGGTAG     |       |
| Sg97_Forward  | GTCGGTTAAGAGGATCCGCG     | crRNA |
| Sg97_Reverse  | CGCGGATCCTCTTAACCGAC     |       |
| Sg95_Forward  | CGCTATGATCATCGACAAGC     | crRNA |
| Sg95_Reverse  | GCTTGTCGATGATCATAGCG     |       |
| CSFV_DL_F     | CTAGCCATGCCCCACAGTAGGA   | qPCR  |
| CSFV_DL_R     | CTCCATGTGCCATGTACAGCA    |       |
| PEDV_DL_F     | TCTCACTACTTCTGTGATGGGC   | qPCR  |
| PEDV_DL_R     | GATGAAGCATTGACTGAACGAC   |       |
| PRV_DL_F      | GGTTCAACGAGGGCCAGTACCG   | qPCR  |
| PRV_DL_R      | GCGTCAGGAATCGCATCACGT    |       |
| IFNalpha_DL_F | GCCTCCTGCACCAGTTCTACA    | qPCR  |
| IFNalpha_DL_R | TGCATGACACAGGCTTCCA      |       |
| IL6-DL_F      | CTGGCAGAAAACAACCTGAACC   | qPCR  |
| IL6-DL_R      | TGATTCTCATCAAGCAGGTCTCC  |       |
| ISG15_DL_F    | ACTGCATGATGGCATCGGAC     | qPCR  |
| ISG15_DL_R    | CAGAACTGGTCAGCTTGCAC     |       |
| ISG56_DL_F    | TTAGAAAACAGGGTCTTGGAGGAG | qPCR  |
| ISG56_DL_R    | CGTAAGGTAATACAGCCAGGCATA |       |
| RSAD2_DL_F    | AAGCAGAGCAGTTTGTTCATCAGC | qPCR  |
| RSAD2_DL_R    | TTCCGCCCGTTTCTACAGT      |       |
| MXA_DL_F      | GATCCGGCTCCACTTCCAAA     | qPCR  |

|             |                          |      |
|-------------|--------------------------|------|
| MXA_DL_R    | CTCTTGTCGCTGGTGTCACT     |      |
| CDC5L_DL_F  | GTGGGACAACCTCCCAAACCA    | qPCR |
| CDC5L_DL_R  | GGAAGGCCCAACAAGCCTAA     |      |
| ELAVL1_DL_F | GGTTCCTCCGAGCCCATTAC     | qPCR |
| ELAVL1_DL_R | GAACCTGAATCTCTGCGCCT     |      |
| PPIL3_DL_F  | ATCACCTATGGCAAGCAGCC     | qPCR |
| PPIL3_DL_R  | TACTGAGCAAATGGGTTGGCA    |      |
| SRSF1_DL_F  | CAACGATTGCCGCATCTACG     | qPCR |
| SRSF1_DL_R  | TCCTCGAACTCAACGAAGGC     |      |
| TRA2B_DL_F  | GAACTACGGCGAGCGGGAAT     | qPCR |
| TRA2B_DL_R  | CTTGAGCGAGACCTTGCAG      |      |
| PCBP2_DL_F  | CCTGCTAGTCAGTGTGGCTC     | qPCR |
| PCBP2_DL_R  | GTCTCCAACATGACCACGCA     |      |
| OT1_F       | GGTGGCCGAAAGTGATACAGAA   | PCR  |
| OT1_R       | GCCCTTTACACCCGGAACCA     |      |
| OT2_F       | ATGTAAGCAGTGCGTTGGAGT    | PCR  |
| OT2_R       | GAACATCAAATGAGCGCAACGA   |      |
| OT3_F       | TGCATGCACCATAAGAAAGGCCT  | PCR  |
| OT3_R       | TGCTGACAGGTTGCTTTACAGGTG |      |
| OT4_F       | CCTGCGAAGCTGGCACTTAC     | PCR  |
| OT4_R       | CGAAGGACCAAATAAGCCAGC    |      |
| OT5_F       | ACACAGCCTCCTAGCCTCTT     | PCR  |
| OT5_R       | AGAAGGCGGGGAAATGAAGG     |      |
| OT6_F       | AAGTACAGCAACCCAGTTTCCA   | PCR  |
| OT6_R       | AGCCTTGGTCTGATCTATAGGGAG |      |
| OT7_F       | AATGCCGGACTACCTCGGTG     | PCR  |
| OT7_R       | CAACATCAGTTGCCTTCGTGTG   |      |
| OT8_F       | TGCTCATGAAACCTGTGCCCTC   | PCR  |

OT8\_R

GAAATCCACCGTGGACTGTTACAG

---

580

581

582

583
